# Supplementary material
Source: PubMed Central journal article supplement (PMC154342)
Supplement: pnas_0931346100_1.pdf [file pnas_0931346100_1.pdf]

**Table 1. PCR primers**

| Human B23     |                              |                              |
|---------------|------------------------------|------------------------------|
| <u>Region</u> | <u>5'-primer</u>             | <u>3'-Primer</u>             |
| A             | 5'-TCTTAGGGCGATGTCCTTGC-3'   | 5'-GCTGTGTAAGATATGGCGGG-3'   |
| B             | 5'-TGCGCGTTACGACTGGAAAG-3'   | 5'-AGAACGCTGCTCCAGAGAAC-3'   |
| C             | 5'-AAGCATGGGCCTGCTTGTG-3'    | 5'-GAGAGCTGCCATCACAGTAC-3'   |
| D             | 5'-ATGAGGATACTGGTGCCCAG-3'   | 5'-AAACCCAAGTGGGACTCTCC-3'   |
| E             | 5'-GTTGTGAACTAAAGGCCGAC-3'   | 5'-GCTAGTCTCTGGTAGACATG-3'   |
| F             | 5'-AGACTAGCCTTCTGCTCAAC-3'   | 5'-AGATTACACCACTGCACTCC-3'   |
| G             | 5'-CTGGAGTGCAGTGGTGTAAATC-3' | 5'-ACACACCTAGGCTACAAACC-3'   |
| H             | 5'-AGGTTTGTAGCCTAGGTGTG-3'   | 5'-TGTAAGTGCCCTTACCGTTG-3'   |
| I             | 5'-TGGAGTTCGATGGTCAACTC-3'   | 5'-AACTGGGAACCAAGCAACTG-3'   |
| J             | 5'-ACCAAGTCCAGTTGCGTTTC-3'   | 5'-AAGAGTCCAATCTGGGCAAC-3'   |
| K             | 5'-ATGTTGCCAGATTGGACTC-3'    | 5'-TTCACATCCTCCTCCTCTTC-3'   |
| L             | 5'-TACCCATCAAGCCTGGTATG-3'   | 5'-GGTACTGGCACACATAAGAC-3'   |
| M             | 5'-CTGGTCTTGAACCTCTAACC-3'   | 5'-ACCAAACAAGCTGGGCTTGG-3'   |
| N             | 5'-TCACTGTAACCTTCTGCCTCC-3'  | 5'-CTGGCATTAGAACCCAATCC-3'   |
| Human PRDX3   |                              |                              |
| <u>Region</u> | <u>5'-primer</u>             | <u>3'-Primer</u>             |
| A             | 5'-TACTCATGAAGCTCAGGCAG-3'   | 5'-TGAAGCCAAGTGTTTCAGTGG-3'  |
| B             | 5'-GACACAGTAATCCACACAAGG-3'  | 5'-CCATCTTCAGTGCCTCCGGG-3'   |
| C             | 5'-TGGAGACACTGGTGGCTCCG-3'   | 5'-AGTCTGAGAAAGGCCAAGGC-3'   |
| D             | 5'-GCCTTCGCCTTTCTCAGACT-3'   | 5'-GCCACCGCACTCTGCCGTT-3'    |
| E             | 5'-CAGGGACAGCTGAAACCACC-3'   | 5'-CAGAGCCCCTGTCCAGAGAC-3'   |
| F             | 5'-CCTCCTGTTTCTGTTTCATGG-3'  | 5'-AGAGACGGGATTTACCAGG-3'    |
| G             | 5'-CATGCCATGCACCTGCTGTC-3'   | 5'-ACAAGCTACAGATCCCAGCT-3'   |
| H             | 5'-CTGTGAAGTTGTGCGAGTCT-3'   | 5'-GTTTACCTGTAACCCCAGCT-3'   |
| I             | 5'-AGGAGGCGGTGGTTGCCATG-3'   | 5'-GTCACAGCTAGAAAGGAGCA-3'   |
| J             | 5'-GGCCACACTGCTCCATACTC-3'   | 5'-ATCCTAACAAGTGTGCCAG-3'    |
| K             | 5'-GGTGGACTTCAGCTGGCTGC-3'   | 5'-TTCTCAGGTGTGATCACAGC-3'   |
| L             | 5'-TGGTGACCTGGTCCAGTACT-3'   | 5'-GGTTTCTTCCACGCTTCGGC-3'   |
| M             | 5'-TCAGATCAAGCCAAGTCCAG-3'   | 5'-CTGTAGAACTAGCTAGCCA-3'    |
| Human JPO1    |                              |                              |
| <u>Region</u> | <u>5'-primer</u>             | <u>3'-Primer</u>             |
| A             | 5'-ATTCAGTACACCAAGAGAGG -3'  | 5'-GTCAGTGC GAACGAGAAAAC -3' |
| B             | 5'-CAGGGTAGTTCTCAATTCTG -3'  | 5'-GGCGTTTAGCACTTTCATTG -3'  |
| C             | 5'-CAATGAAAGTGCTAAACGCC -3'  | 5'-CCCCTATATATTCTGACCTC -3'  |
| D             | 5'-GTGCACCTGGGATAACTGAG -3'  | 5'-GCACTGGCTCCGAGTTGTG -3'   |

|   |                               |                              |
|---|-------------------------------|------------------------------|
| E | 5'-GAAGCCAGAACGTAGGGTC -3'    | 5'-GCTCAGATTTGAACTCAGGC -3'  |
| F | 5'-ATGGCAGACTTGAGTTCTCC -3'   | 5'-CAAAAATCAGCCGGATGTGG -3'  |
| G | 5'-GGCAAGAATGTTCTGGTCAC -3'   | 5'-GTTCTTGTTGCTGTCCCTTTG -3' |
| H | 5'-CTGGTGAGAGCCTCTAAATTAC -3' | 5'-GTGTACCACCACACTCCAGC -3'  |

---
