# Supplementary material
Source: PubMed Central journal article supplement (PMC154342)
Supplement: pnas_0931346100_2.pdf [file pnas_0931346100_2.pdf]

**Table 2. Summary of *in vitro* and *in vivo* E-box binding**

| Gene  | E box | Position* | E box sequence <sup>†</sup> | % Shift <sup>‡</sup> | Chromatin immunoprecipitation |
|-------|-------|-----------|-----------------------------|----------------------|-------------------------------|
| B23   | UpE1  | -77       | CACGcG                      | 7                    | No                            |
| B23   | In1E2 | +725      | CACGTG                      | 22                   | Yes                           |
| B23   | In4E1 | +4,377    | CACGTG                      | 29                   | No                            |
| PRDX3 | UpE1  | -173      | CACGTG                      | 48                   | Yes                           |
| PRDX3 | In1E1 | +200      | CAtGcG                      | 22                   | Yes                           |
| PRDX3 | In1E2 | +501      | CgCGTG                      | 20                   | Yes                           |
| PRDX3 | In1E3 | +1,111    | CgCaTG                      | 16                   | ND                            |
| PRDX3 | Ex2E2 | +1,707    | CAtGTG                      | 4                    | No                            |

\*Distance from transcript start to first C of E box.

<sup>†</sup>Upper case indicates match to canonical E box.

<sup>‡</sup>At 5ng/ $\mu$ l.
