# Supplementary material
Source: PubMed Central journal article supplement (PMC154342)
Supplement: pnas_0931346100_6.pdf [file pnas_0931346100_6.pdf]

# Class IA

B23

|       |            |            |            |            |            |            |       |      |       |      |       |     |
|-------|------------|------------|------------|------------|------------|------------|-------|------|-------|------|-------|-----|
|       | .....      | 730.       | .....      | 740.       | .....      | 750.       | ..... | 760. | ..... | 770. | ..... | 780 |
| Human | GAGGAGGCCC | CAACCGCTGG | GAGCACGTGG | TTGCCACGTG | GTTGGGGGA  | GGGAGGGGG  |       |      |       |      |       |     |
| Mouse | GAAGGGGCAG | CAACCCCTAG | GAGCACGTGG | TTGCCACGTG | GTTGGGGGTT | AGGGAGGGGG |       |      |       |      |       |     |
| Rat   | -GAGGGGCCG | CAACCCCTAG | GAGCACGTGG | TTGCCACGTG | GTTGGGGGTT | AGGGAGGGGG |       |      |       |      |       |     |

CAD

|       |            |            |            |            |            |            |       |      |       |      |       |     |
|-------|------------|------------|------------|------------|------------|------------|-------|------|-------|------|-------|-----|
|       | .....      | 220.       | .....      | 230.       | .....      | 240.       | ..... | 250. | ..... | 260. | ..... | 270 |
| Human | TCCAGCGCCC | CGCGCCGTTA | GCCACGTGGA | CCGACTCCGG | CGCGCCGTCC | TCACGTGGTT |       |      |       |      |       |     |
| Mouse | TCCAGCGCCC | CGCGCAGCGA | GCCACGTGGA | CCAACTCCGG | CGCGCGGTGT | TCGCTTGGTT |       |      |       |      |       |     |
| Rat   | TCCAGCGCCC | CGCGCAGCGA | GCCACGTGGA | CCAACTCCGG | CGCGCGGTGT | TTGCTTGGTT |       |      |       |      |       |     |

CDK4

|       |            |            |            |            |            |      |       |      |       |     |
|-------|------------|------------|------------|------------|------------|------|-------|------|-------|-----|
|       | .....      | 140.       | .....      | 150.       | .....      | 160. | ..... | 170. | ..... | 180 |
| Human | CCAGTCAAGT | GCCACACAGC | GTAGCCACAC | CTCTGCTCCT | CAGAGCAATG |      |       |      |       |     |
| Mouse | CCAGTCAAGT | GCCACACAGC | GTAAACACAC | CTCTGCTTCC | CAGCGCAAG  |      |       |      |       |     |
| Rat   | CCGGTCAAGT | GCCACACAGC | GTAAACACAC | CTCTGCTTCT | CAGCGCAAG  |      |       |      |       |     |

|       |           |             |           |            |           |      |       |      |       |     |
|-------|-----------|-------------|-----------|------------|-----------|------|-------|------|-------|-----|
|       | .....     | 190.        | .....     | 200.       | .....     | 210. | ..... | 220. | ..... | 230 |
| Human | TCAAGCGGT | ACGTGTTGATA | GCAACAGAT | ACGTGGCTGC | CATCGCCCT |      |       |      |       |     |
| Mouse | TCAAGGGGT | ACGTGGATA   | GCAACAGGT | ACGTGGCTGC | CAGGGCC   |      |       |      |       |     |
| Rat   | TAAAGGGGT | ACGTGGATA   | GCAACAGGT | ACGTGGCAGT | ACAAGTC   |      |       |      |       |     |

Cyclin D2

|       |            |            |            |            |            |     |       |     |       |     |
|-------|------------|------------|------------|------------|------------|-----|-------|-----|-------|-----|
|       | .....      | 10.        | .....      | 20.        | .....      | 30. | ..... | 40. | ..... | 50. |
| Human | TTGACTCAAG | CATGCGTTAG | AGCACATGTC | AGGGCCGACC | GTGCTGGCGG | C   |       |     |       |     |
| Mouse | TTGACCACAG | GATGCTTTAG | AGCACATGTC | AGAGCCGACC | CCAAAATCCT | G   |       |     |       |     |
| Rat   | TTGACCACAG | GATGCTTTAA | AGCACATGTC | AGAGCCGACC | C-AAAATCCA | G   |       |     |       |     |

|       |            |            |             |            |            |     |       |     |       |     |
|-------|------------|------------|-------------|------------|------------|-----|-------|-----|-------|-----|
|       | .....      | 10.        | .....       | 20.        | .....      | 30. | ..... | 40. | ..... | 50. |
| Human | CTCGAGCCAC | GCCATGCCC  | CTGCACATGTC | CAGCTTGGCC | AGCACATCAG | G   |       |     |       |     |
| Mouse | -GCAACCCAC | GCCATGCTAT | CTGCACATGTC | CAGCGTGGCC | ACCATGCGGG | G   |       |     |       |     |
| Rat   | -TCACGCCAT | GCTATCTGCA | CTGCACATGTC | CAGCGTGGCC | ACCATGCGGG | G   |       |     |       |     |

## ID2

|       | 340        | 350        | 360        | 370        | 380        | 390         |
|-------|------------|------------|------------|------------|------------|-------------|
| Human | GGAGAGGCGT | CATGGGGCGC | ATAGCTGTCA | CGTGACGGTC | AGAGACTGCT | GGCCCCACCA  |
| Mouse | AGAGAGAAGC | CCTGGGGCAC | ATGGCTGTCA | CGTGGAGGTC | AGAGACCGCC | TGGCCCCACCA |
| Rat   | AGAGAGAAGC | CCTGGGGCAC | ATGGCTGTCA | CGTGGAGGTC | AGAGACTGCC | TGGCCCCACCA |

## LDH-A

|       | 290        | 300        | 310         | 320        | 330         |
|-------|------------|------------|-------------|------------|-------------|
| Human | CACCTTACTT | AGAC-TCCA  | GCACACGTGG  | AGCAGTCTGC | CGGTCCGGTTG |
| Mouse | CCTTTCTTTG | GGGTGTCGCA | GCAACACGTGG | AGCCA-CTCT | TGCAGGGACA  |
| Rat   | CCATTCTTAG | AGGTGTCGCA | GCAACATGTGG | AGCCA-CCCT | TACAGAGCCA  |

  

|       | 390       | 400        | 410         | 420 | 430     |
|-------|-----------|------------|-------------|-----|---------|
| Human | ATCC-ACC  | CCAGCCGACT | CAACACGTGG  | TTC | CCGCACG |
| Mouse | GCCC-GCCC | CGGCCAGCC  | TAAACACGTGG | TTC | CCGCACG |
| Rat   | GCCC-GCCC | TAGCCAGCC  | TAAACACGTGG | TTC | CCGCACG |

## MNT

|       | 70              | 80        | 90         | 100        | 110       | 120   |
|-------|-----------------|-----------|------------|------------|-----------|-------|
| Human | GACGTGGACGGGCTC | CGCCCCGAC | CACGTGCACC | GGGGACTCTC | CTGCTGGGA | CGGCG |
| Mouse | GACGTAGTCAGGCC  | CGCCCCGAC | CACGTGCACG | GGGGACTCTC | CCGCTGGGA | CTGTG |

## PTMa

|       | 60         | 70         | 80          | 90         | 100        | 110        |
|-------|------------|------------|-------------|------------|------------|------------|
| Human | AGGGACGCAC | TCGGCGGCC  | CGGGCACAGT  | GCTCCCTGCG | CGCGGTGCGT | GCC-GAGGCC |
| Mouse | CAGGGCGCAC | TTGGCG-CCC | CGGGCACAGT  | GCTCTTTGCG | CGCGGTGCGT | GCAAGAGGCT |
| Rat   | CAGGGCGCAC | TTGGCG-CCC | CAGGGCACAGT | GCTCGTTGCG | CGCGATGCGT | GCC-GAGGCT |

# Class IB

## ODC

|       |        |       |          |      |        |        |       |       |        |       |        |       |
|-------|--------|-------|----------|------|--------|--------|-------|-------|--------|-------|--------|-------|
|       | .....  | 70    | .....    | 80   | .....  | 90     | ..... | 100   | .....  | 110   | .....  | 120   |
| Human | CACGTG | GTGC  | G-G-CGCG | -C   | CTCGCG | CGGC   | CTGC  | GGAGA | CACGTG | GTTCG | CCGAG  | CGGC  |
| Mouse | CACGTG | TTCGC | GAGGCC   | CGGA | CTGT   | CGGCGC | CGGCA | GGGGA | CACGTG | GCCCG | GGGAC  | CGGTG |
| Rat   | CACGTG | TTCGC | GAGGCC   | CGGA | CTGCG  | GTTCGC | CGGCA | GGGGA | CACGTG | GCCCG | GAGGCT | TGGTG |

## NM23B

|       |         |      |        |      |        |      |        |       |        |       |        |       |
|-------|---------|------|--------|------|--------|------|--------|-------|--------|-------|--------|-------|
|       | .....   | 560  | .....  | 570  | .....  | 580  | .....  | 590   | .....  | 600   | .....  | 610   |
| Human | TTTGGGG | TTTG | GAGCGG | CTGG | TACGTG | GGCT | GGCCC  | CGGCG | GGTGC  | CGCGG | GCGTT  | GGGTC |
| Mouse | TTCCCC  | -CGG | ACGTGG | TGTG | TACGTG | GGTG | GGGAGG | C-T   | GGTTCC | CGGA  | GACGTG | CTG   |
| Rat   | TTCCCC  | -CGG | ACGTGG | TGTG | TACGTG | GGTG | GGGAGG | C-T   | GGTTCC | CGA   | GACGTG | CTG   |

|       |        |       |       |       |      |        |       |       |      |       |       |       |    |
|-------|--------|-------|-------|-------|------|--------|-------|-------|------|-------|-------|-------|----|
|       | 1      | ..... | 10    | ..... | 20   | .....  | 30    | ..... | 40   | ..... | 50    | ..... | 60 |
| Human | GCGGGG | CGGA  | AGCGG | CCGG  | AAGC | CACGTG | TCCC  | CGCGG | CGCG | CGTGG | TGGGG | AGGAG |    |
| Mouse | GCGGGG | CGA   | AGTAT | CTGGA | AAGC | CACGTG | TCCTC | -     | -    | CGCAG | CGCGG | CGGTG |    |
| Rat   | GTGGGG | CGA   | AATAT | CTGGA | AAGC | CACGTG | TCCTC | -     | -    | CGCAG | CGCGG | CGGTG |    |

## Nucleolin

|       |         |    |       |       |       |        |       |       |       |
|-------|---------|----|-------|-------|-------|--------|-------|-------|-------|
|       | .....   | 70 | ..... | 80    | ..... | 90     | ..... | 100   | ..... |
| Human | AGCTGGG | -A | CTCGA | CTCCT | GACG  | CACGTG | CCCG  | GGAG  | CGG   |
| Mouse | CCCGGGG | -C | CCCGC | CTCCC | CGCG  | CACGTG | CTCT  | GGTGC | CGG   |
| Rat   | CTCGGGG | GC | CCCGC | CTCCC | GGCG  | CACGTG | CTC   | GGTGC | CGG   |

|       |       |     |       |      |       |      |       |      |       |       |         |      |        |   |
|-------|-------|-----|-------|------|-------|------|-------|------|-------|-------|---------|------|--------|---|
|       | ..... | 110 | ..... | 120  | ..... | 130  | ..... | 140  | ..... | 150   |         |      |        |   |
| Human | TGC   | CA  | CGTGG | GGCC | GGC   | G    | -     | -    | CCGC  | GTGG  | GTCTCTG | G    | AATCTC | - |
| Mouse | CGC   | CA  | CGTGG | CTCT | GGC   | GGAG | GC    | CCGC | ACGTG | TCGCG | CGAC    | CCCG | GGG    |   |
| Rat   | CGC   | CA  | CGTGG | GT   | TAC   | GGC  | GC    | CCGC | ACGTG | TCGCG | CG      | TCCG | AGG    |   |

## Prohibitin

|       |        |       |       |       |       |        |        |        |        |       |       |       |
|-------|--------|-------|-------|-------|-------|--------|--------|--------|--------|-------|-------|-------|
|       | .....  | 1780  | ..... | 1790  | ..... | 1800   | .....  | 1810   | .....  | 1820  |       |       |
| Human | TCTTAG | CCCTC | TGT   | ACAGG | GAT   | AGGC   | CACGTG | CC     | ATTTAG | CCCC  | AGAAA | ACTAC |
| Mouse | GAACCA | CCCTC | CTT   | GAGGA | AAT   | AGGC   | CACGTG | CC     | ATATAT | TACC  | AAGGA | ACTAC |
| Rat   | -      | -     | -     | GACT  | CGGC  | CACGTG | CC     | ATATAT | TACC   | AAGGC | ACTAC |       |

## SHMT1

|       |        |     |       |        |        |      |       |     |       |        |       |        |      |        |
|-------|--------|-----|-------|--------|--------|------|-------|-----|-------|--------|-------|--------|------|--------|
|       | .....  | 70  | ..... | 80     | .....  | 90   | ..... | 100 | ..... | 110    | ..... | 120    |      |        |
| Human | GGACCG | GGG | CGCC  | CACGTG | GGCT   | TCCG | GGG   | GC  | AGCCT | GGCC   | CGGG  | CCCTGA |      |        |
| Mouse | GCA    | -   | GG    | AACC   | CACGTG | GCTT | CC    | TG  | GGCC  | GGCTT  | GGT   | CGCCG  | GCCT | CATCGA |
| Rat   | GCA    | -   | GG    | AACC   | CACGTG | GCTT | CC    | TG  | GGCC  | GGCTAG | GGT   | CGTCCG | GCCT | CATCGA |

## SHMT2

|       |       |        |       |       |       |        |       |      |        |      |        |        |
|-------|-------|--------|-------|-------|-------|--------|-------|------|--------|------|--------|--------|
|       | ..... | 250    | ..... | 260   | ..... | 270    | ..... | 280  | .....  | 290  | .....  | 300    |
| Human | TGGG  | GTTCTC | TTGG  | CTTT  | CCATG | CACGTG | GATT  | GGGG | CCTCAG | GGAG | CGGACG | TGTAAC |
| Mouse | TGGG  | GTTCTC | CTGG  | CTCCT | TGCTG | CACGTG | TCT   | GGGG | CCTCG  | GGAA | CAGATG | CTTAAC |

## Class II

### Cyclin B1

|       |            |            |           |     |         |            |            |      |            |    |       |    |
|-------|------------|------------|-----------|-----|---------|------------|------------|------|------------|----|-------|----|
|       | .....      | 20         | .....     | 30  | .....   | 40         | .....      | 50   | .....      | 60 | ..... | 70 |
| Human | CGCAGGCGCA | GAGGCAGACC | ACGTG     | A   | GAGAGC  | CTGGCCAGGC | CTTCCG     | GCCT | AGCCTCACTG |    |       |    |
| Mouse | CGCAGGCATA | GAGCCTGACC | TCGCGAGGG | TGG | GCGGTGC | TGCCAGCGGC | AGCCTCGCTC |      |            |    |       |    |

### JP01

|       |            |            |       |        |       |      |           |             |        |          |       |        |            |
|-------|------------|------------|-------|--------|-------|------|-----------|-------------|--------|----------|-------|--------|------------|
|       | .....      | 430        | ..... | 440    | ..... | 450  | .....     | 460         | .....  | 470      | ..... | 480    |            |
| Human | GCAGCGCTGG | AAAGCCCTAG | G     | CACGTG | CGT   | CCGC | CAA       | AGGCCCGGACA | GC     | GGCCGGGA |       |        |            |
| Mouse | GC         | GTTCCCGG   | AA    | CC     | TGCG  | G    | CACGGGCGC | TC          | ATGCTC | CA       | CGTG  | CGCGCG | GAGGCCTGGG |

### PRDX3

|       |            |    |           |    |        |    |            |            |            |    |       |    |
|-------|------------|----|-----------|----|--------|----|------------|------------|------------|----|-------|----|
|       | .....      | 40 | .....     | 50 | .....  | 60 | .....      | 70         | .....      | 80 | ..... | 90 |
| Human | GCCTCCCTCC | G  | GGAAAGGT  | T  | CATGCG | CC | TGCGCAGAAC | CGCCCTTCC  | CACTCCATCC |    |       |    |
| Mouse | GCCTCCTGCG | G  | CTAGAAAGG | C  | CTAGCC | CC | TGCGCAGGAC | AGCCTTTACA | CTATCCCGT  |    |       |    |
